# Supplementary material for: Direct plasma deposition of amorphous Si/C nanocomposites as high performance anodes for lithium ion batteries
Source: Royal Society of Chemistry journal article supplement (doi:10.1039/c4ta06334a), 2014-12-23
Supplement: c4ta06334a1.pdf [file c4ta06334a1.pdf]

## Supporting information

### **Direct plasma deposition of amorphous Si/C nanocomposites as high performance anode for lithium ion batteries**

*Xinghua Chang<sup>a,b</sup>, Wei Li<sup>c</sup>, Junfeng Yang<sup>a</sup>, Li Xu<sup>d</sup>, Jie Zheng<sup>\*a</sup> and Xingguo Li<sup>\*a</sup>*

*a* Beijing National Laboratory for Molecular Sciences (BNLMS), (The State Key Laboratory of Rare Earth Materials Chemistry and Applications), College of Chemistry and Molecular Engineering, Peking University, Beijing 100871, China.

*b* Academy for Advanced Interdisciplinary Studies, Peking University, Beijing 100871, China.

*c* BTR New Energy Materials Inc. High Tech Industrial Park, Xitian, Gongming Town, Guangming New District, Shenzhen, China

*d* State Grid Smart Grid Research Institute, Beijing, China 102211

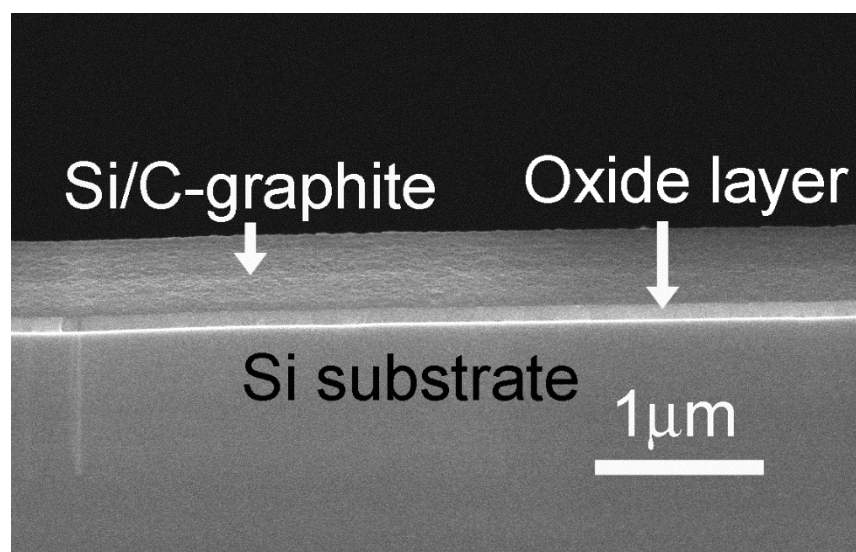

Figure S1 A cross section SEM image of the Si/C-graphite sample deposited on a Si (001) wafer with 100 nm oxide layer

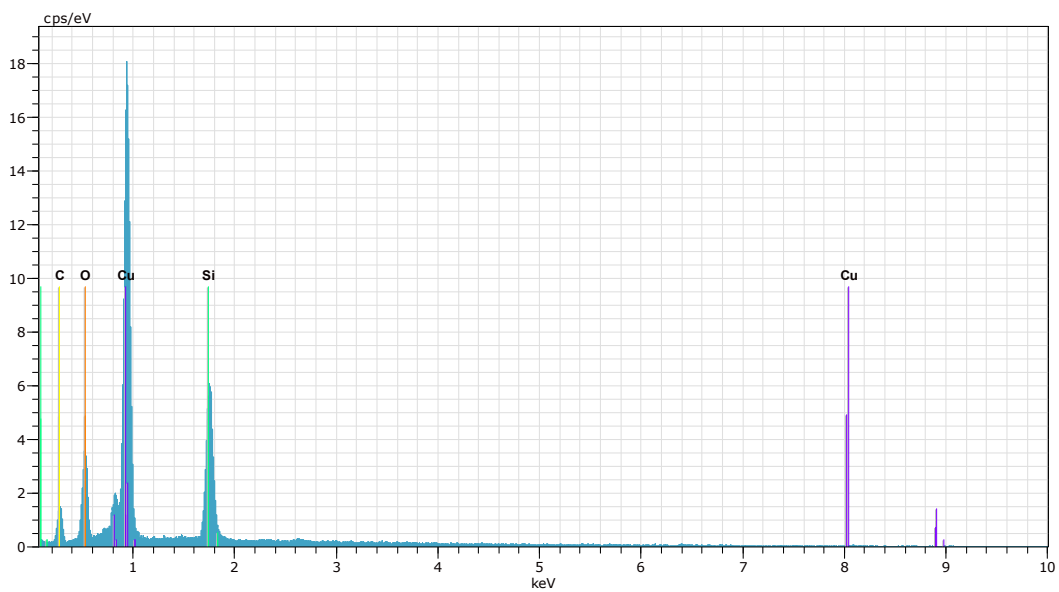

Figure S2 EDS spectrum of the Si/C-graphite sample deposited on a copper foil

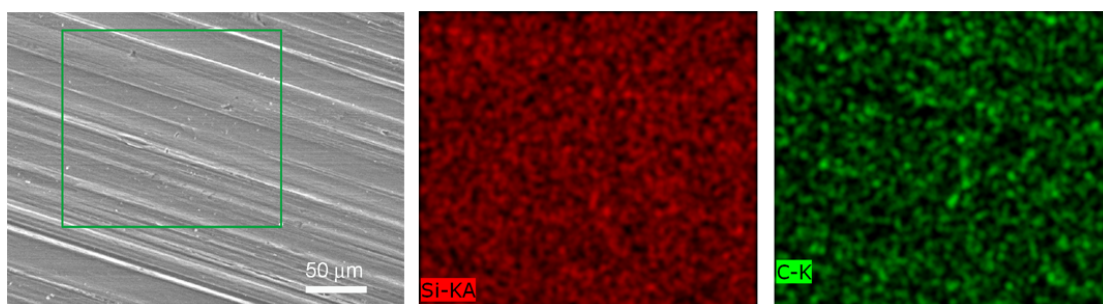

Figure S3 EDS elemental mapping of the Si/C-CH<sub>4</sub> sample in SEM.

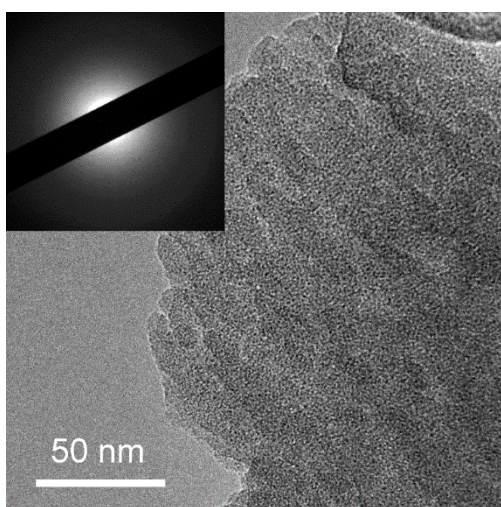

Figure S4 A TEM image of the Si/C-CH<sub>4</sub> sample. The inset is the corresponding electron diffraction pattern.

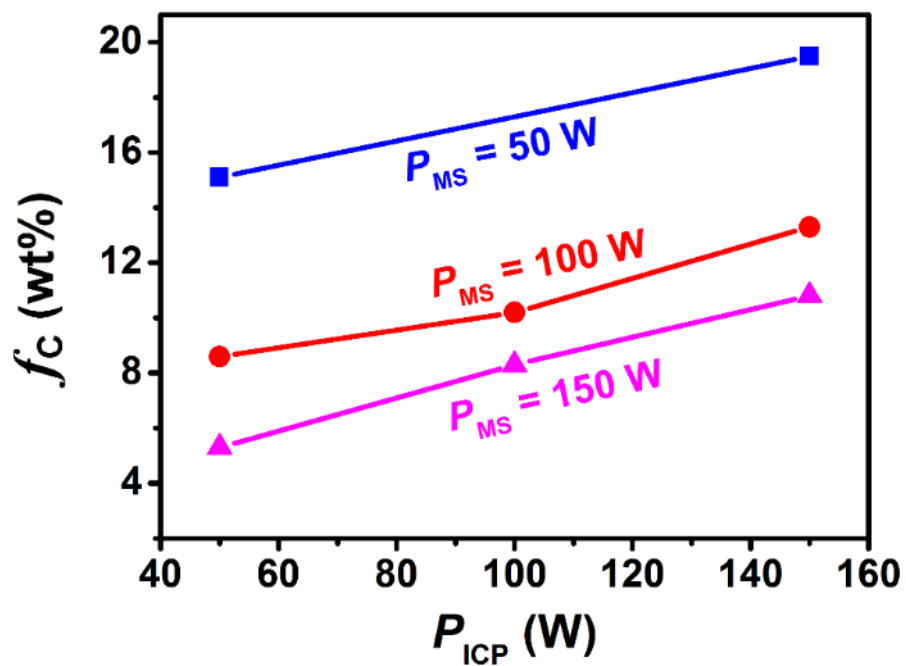

Figure S5 Variation of the carbon fraction ( $f_C$ , in wt%) with the power of the two plasma sources

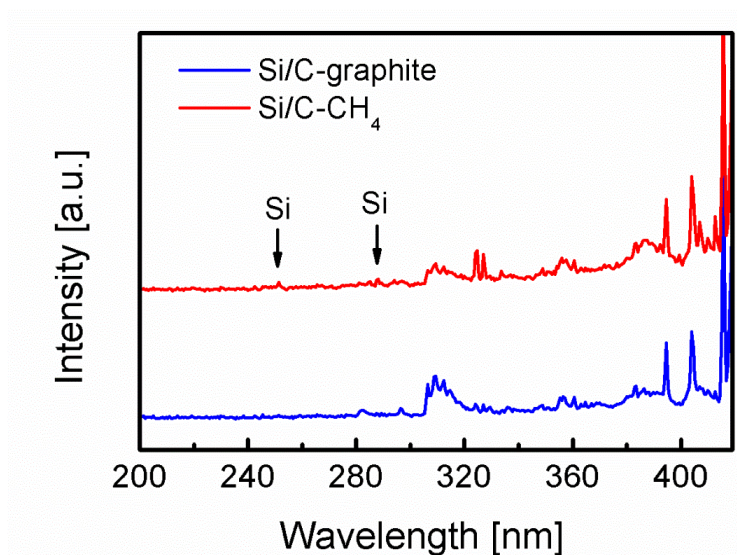

Figure S6 *In situ* optical emission spectra during the preparation of the composites. The emission line from atomic Si is shown by the black arrows in the figure.

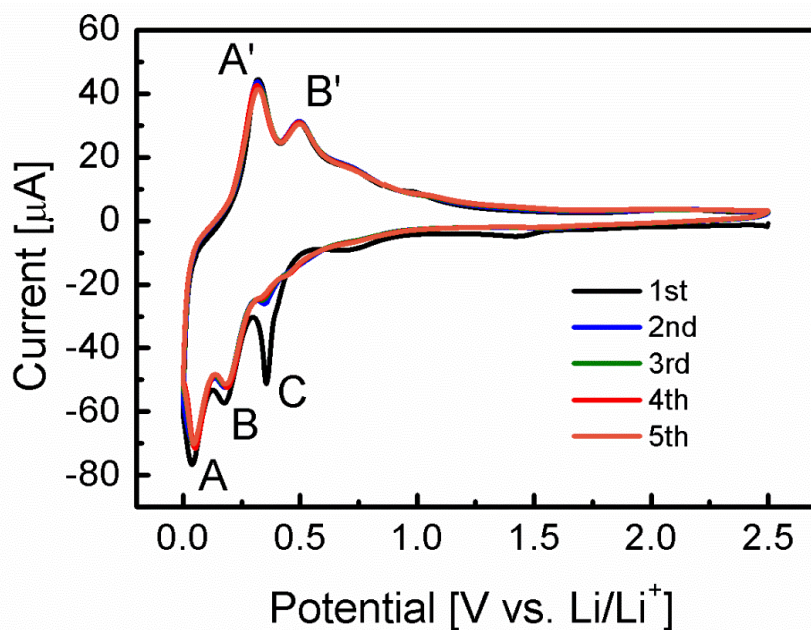

Figure S7 Cyclic voltammetry curve of the first 5 cycles of the Si/C-graphite sample. The C peak in the first cycle is corresponding to the formation of the solid electrolyte interface (SEI) layer. The pairs of peaks A-A' and B-B' are corresponding to the stepwise lithiation/delithiation reactions of Si.

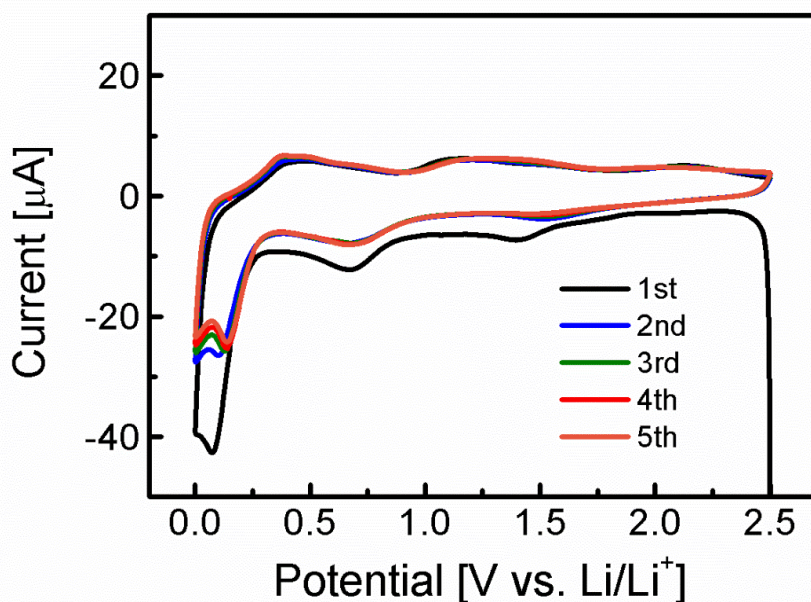

Figure S8 Cyclic voltammetry curve of the first 5 cycles of the Si/C-CH<sub>4</sub> sample.

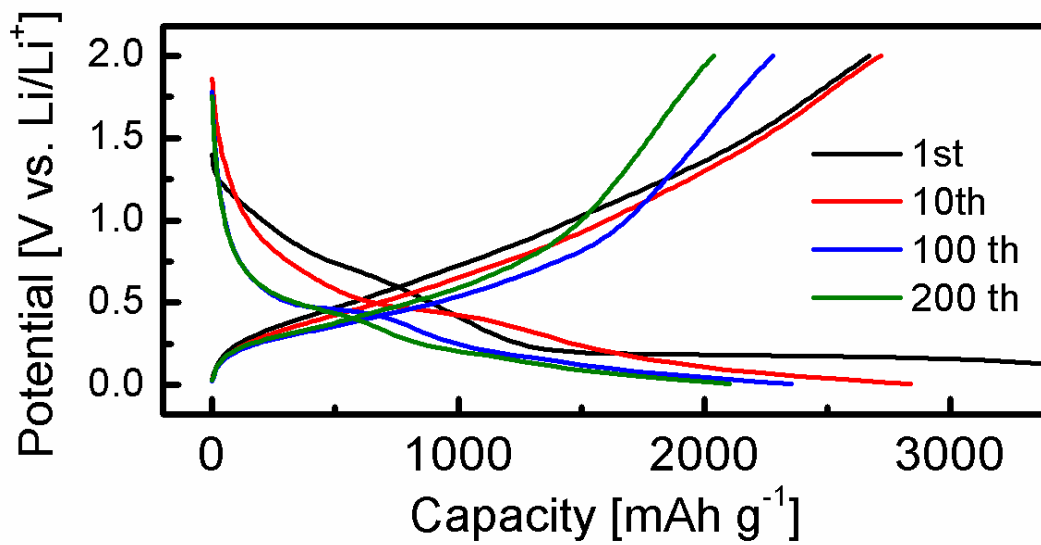

Figure S9 Voltage-capacity curves at different cycle number of the Si/C-graphite sample. The charge/discharge current is 0.40 A·g<sup>-1</sup>.
